# Supplementary material for: Reinforcement of Cement Nanocomposites through Optimization of Mixing Ratio between Carbon Nanotube and Polymer Dispersing Agent
Source: MDPI journal article supplement (doi:10.3390/polym16030428), 2024-02-03
Supplement: s1 [file s1]

## **Supplementary data**

### **Reinforcement of cement nanocomposites through optimization of mixing ratio between carbon nanotube and polymer dispersing agent**

Seok Hwan An, Ki Yun Kim, and Jea Uk Lee\*

<sup>a</sup> *Department of Advanced Materials Engineering for Information and Electronics, Integrated Education Institute for Frontier Science and Technology (BK21 Four), Kyung Hee University, Gyeonggi-do, 17104, Republic of Korea*

\* Corresponding author: Jea Uk Lee; E-mail: [leeju@khu.ac.kr](mailto:leeju@khu.ac.kr)

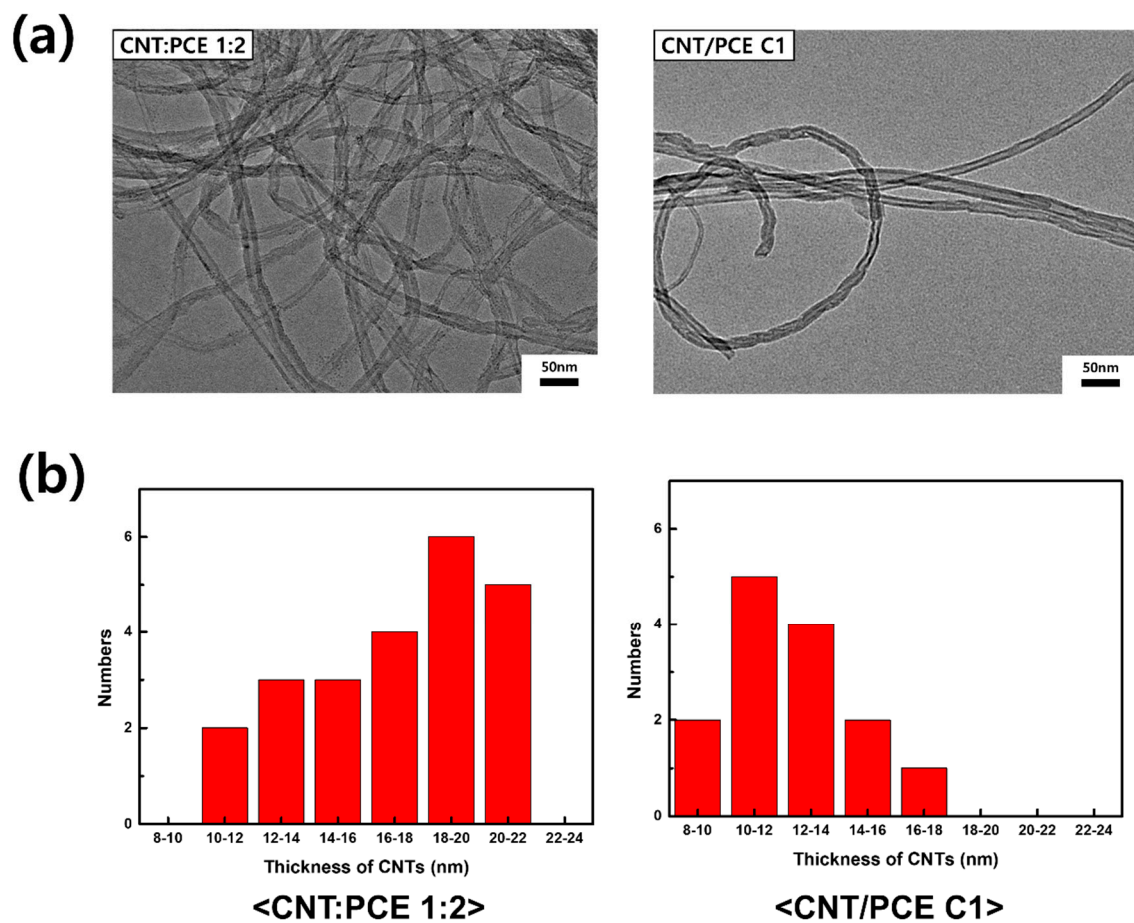

**Figure S1.** (a) FE-TEM images of CNT/PCE dispersion and (b) histogram before and after the centrifugation.

(a)

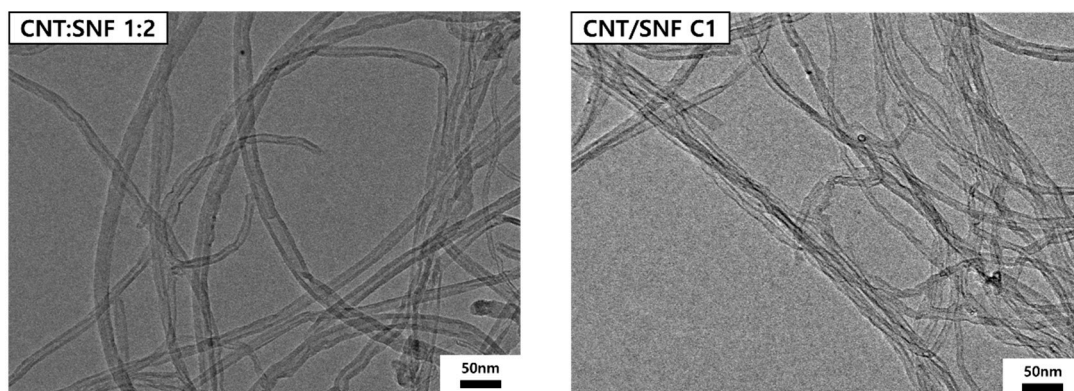

(b)

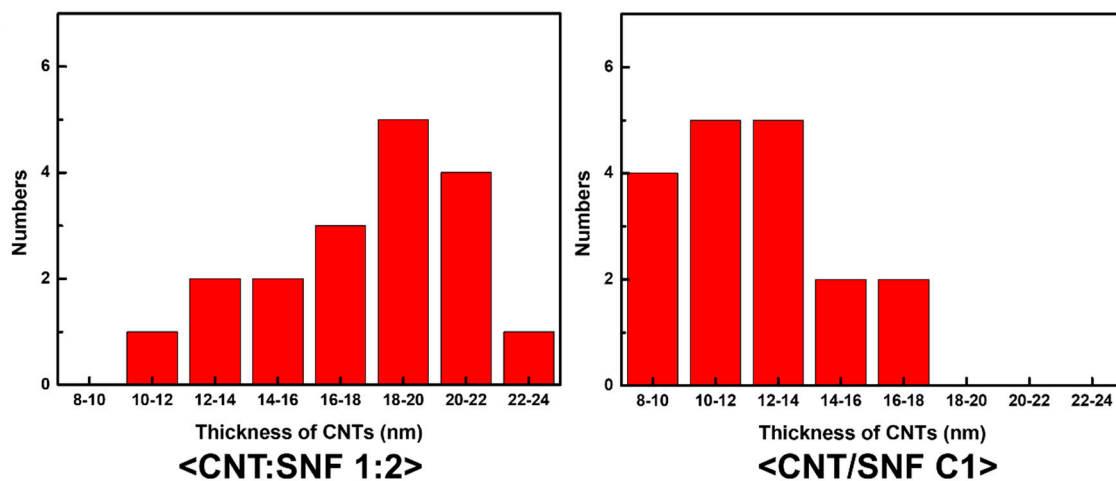

**Figure S2.** (a) FE-TEM images of CNT/SNF dispersion and (b) histogram before and after the centrifugation.

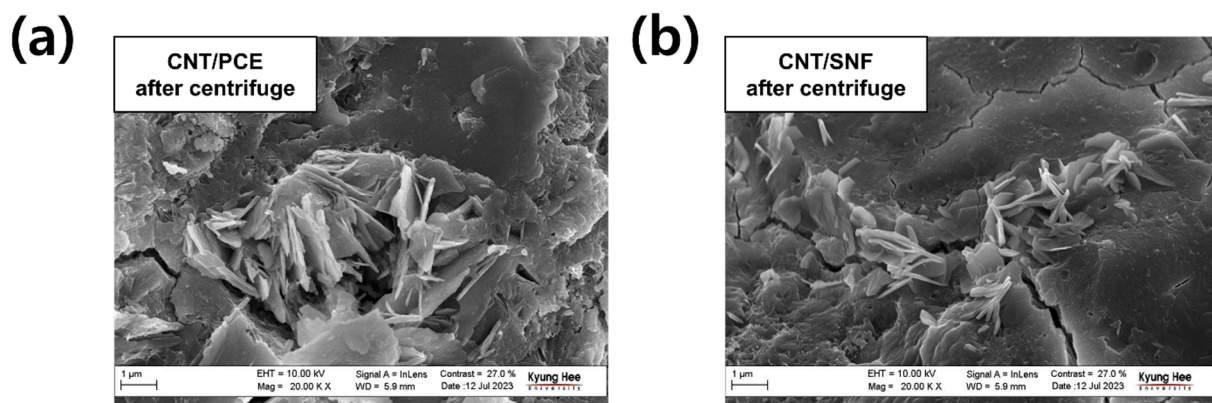

**Figure S3.** High-magnification FE-SEM images of cement nanocomposites of (a) CNT/PCE and (b) CNT/SNF after centrifugation.

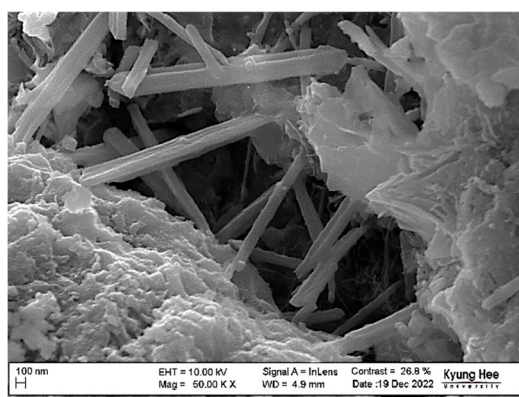

**Figure S4.** High-magnification FE-SEM image of the interior of the crack in the cement nanocomposites using CNT/PCE C1.
